# Supplementary material
Source: publisher site journal article supplement (https://www.dovepress.com/get_supplementary_file.php?f=444600.docx)
Supplement: Supplementary file 1 [file get_supplementary_file.php]

Analysis and validation of critical signatures and immune cell infiltration characteristics in doxorubicin-induced cardiotoxicity by integrating bioinformatics and machine learning

**Chao Huang1, #, Jixiang Pei1, #, Daisong Li1, Tao Liu2, Zhaoqing Li1, Guoliang Zhang1, Ruolan Chen1, Xiao jian Xu1, Bing Li3 4, Zhexun Lian1, *, Xian-Ming Chu1 5, ***

**Supplemental Fig**

**Fig S1.** Analysis of network topology for various soft-thresholding powers

**
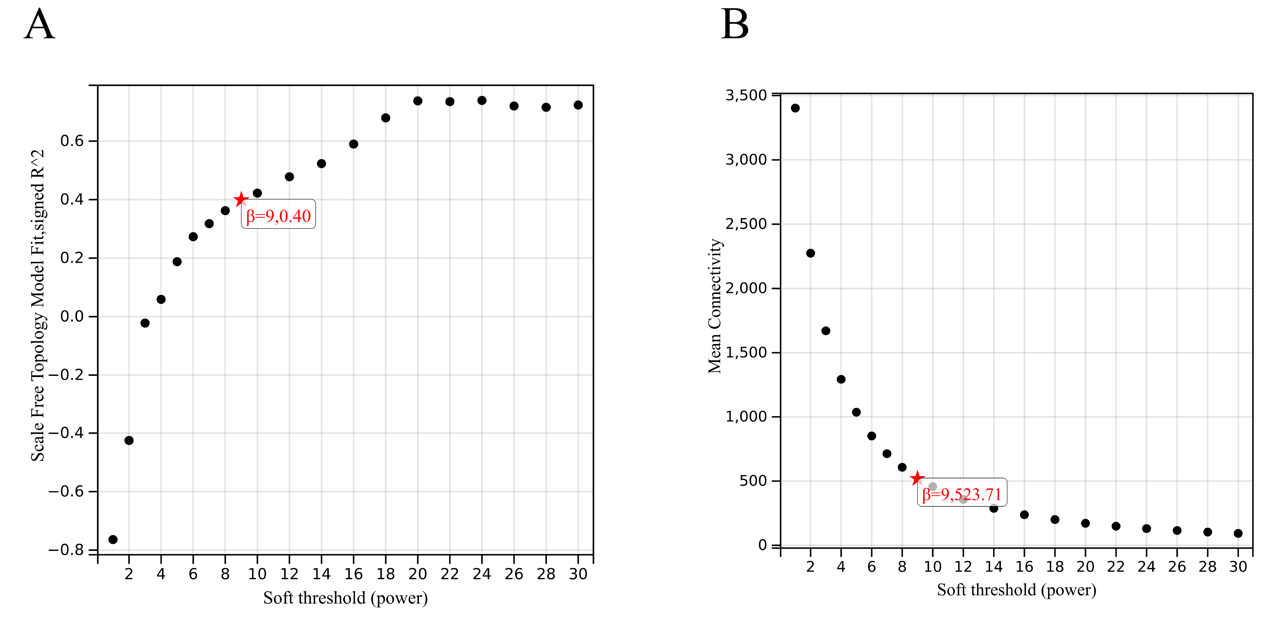
**Fig S1 (A-B) Analysis of network topology for various soft-thresholding powers. (A) Clustering dendrogram of differentially expressed genes related to DOX-induced cardiotoxicity, with dissimilarity based on topological overlap, together with assigned module colors. (B) Module feature vector clustering.

**Supplemental table**

**Table S1. Primer sequences used in this study.**

| Gene | Primer sequence (5'→3') |
| --- | --- |
| GAPDH | Forward: AGCCACATCGCTCAGACAC |
| Reverse: AATACGACCAAATCCGTTGACT |
| mus-CSGALNACT1 | Forward: GCGTAATCTACGGCCATCACGA |
| Reverse: TCCCAAATCCAAAGTCCCTCCAA |
| hsa-CSGALNACT1 | Forward: AGCCGTACAGCCTACTACCTCATG |
| Reverse: TCTTCACAGACACCCGCATCAATC |
| mus-FANCB | Forward: TTGTGGAGCACTCTTCTCCTG |
| Reverse: CAAAACTCCTTGGCTCCTGCAA |
| hsa-FANCB | Forward: TCGGGAATTACGGCAGCATCT |
| Reverse: TCCTTCTCCTCTGCACTTGACG |
| mum-ZNF296 | Forward: CCGACCCCATCTCAGAATCCA |
| Reverse: CGTGGCACAGCAACTTCCAA |
| hsa-ZNF296 | Forward: GCTCAGAACGAGAGGAGCTGA |
| Reverse: GGTAGATGGACAGTCCGTGGTC |

**Table S2. Information of DEGs identified from three strategies.**

| **Strategies** | **Gene name** |
| --- | --- |
| **RF**  **(90)** | GPD1, DTWD2, PCYT1B, ALKBH8, COL27A1, SASS6, VMO1, ZNF296, CSGALNACT1, FANCB, OVGP1, PNKD, CBFB MCMBP, SFMBT1, PPT1, RBM48, DNAJC21, MTHFD1L, NT5DC3, STAT1, BCKDK, NOL8, SAR1B, KHK, VWA9, FAM134B, HOGA1, POLD1, CSNK2A3, CENPH ZNF408, KCNQ1, LEPROTL1, C6orf47, NXF4, TGFB3, NIF3L1, ZNF800, MUM1, MEIG1, FBXL18, RAB33A, APBB3, HSBP1L1, DPH5, SLC25A25, KL GALM, DRG2, ACOT11, ZNF37A, SLC32A1, ZCCHC2, MAF, ABHD15, NUDT18, CREBRF, FANCD2, FOXD2, SPPL2C, PCYOX1L, FAM175A, C22orf46, ZNF605, SPATA6, SLC22A4, MYRF, KIF14, DOCK8, ZNF821, TBX5, CAND2, RBM28, TP73, ENKUR, PLEKHG4B, KCNN3, SLFN12, ALKBH3, PNP, OLFM2, ADAMTS3, MATN1, EEFSEC, FURIN, TRMT61, BNCEH1, SH3RF2, ALPK2; |
| **LASSO**  **(15)** | SH3TC2, RHBDL3, FANCB, CSGALNACT1, ADAMTS8, ZNF296, C1orf112, DCAF12L1, IRX5, PAQR6, JRK, MTFR2, ZBTB37, GRIP2, CYGB; |
| **WGCNA**  **(3370)** | AADAT, AAR2, AARD, AARS2, AASDH, ABAT, ABCA1, ABCA7, ABCB10, ABCB6, ABCB7, ABCC10, ABCC11, ABCC12, ABCC4, ABCC6, ABCE1, ABCG1, ABHD12, ABHD15, ABHD3, ABHD5, ABHD8, ABTB1, ABTB2, ACAD10, ACADS, ACADVL, ACBD4, ACBD6, ACBD7, BICD2, ACD, BMP1, BOD1L1, BRAF, BRAT1, BRCA1, BRCA2, BRF2, BRPF3, BSDC1, BST2, BTBD11, BTBD2, BTC, BTD, BTG3, BTN2A2, …… |
